# Supplementary material
Source: publisher site journal article supplement (https://en-cdn.bio-protocol.org/attached/file/20181108/3084%20Supplementary%20file%20Figure%20S2.docx)
Supplement: Supplementary file 1 [file 3084%20Supplementary%20file%20Figure%20S2.docx]

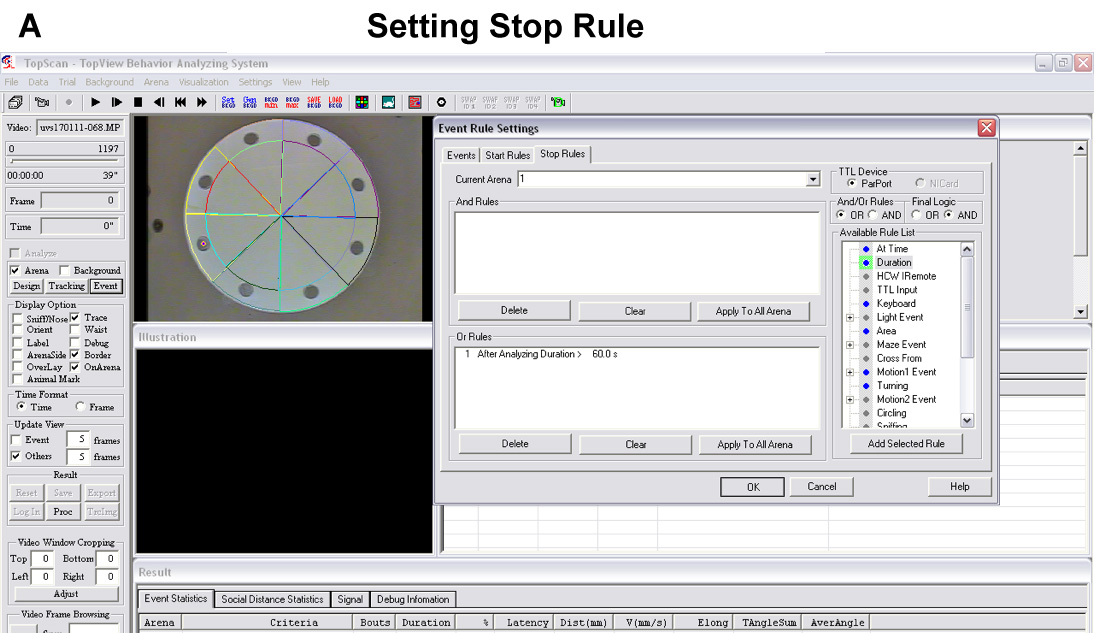


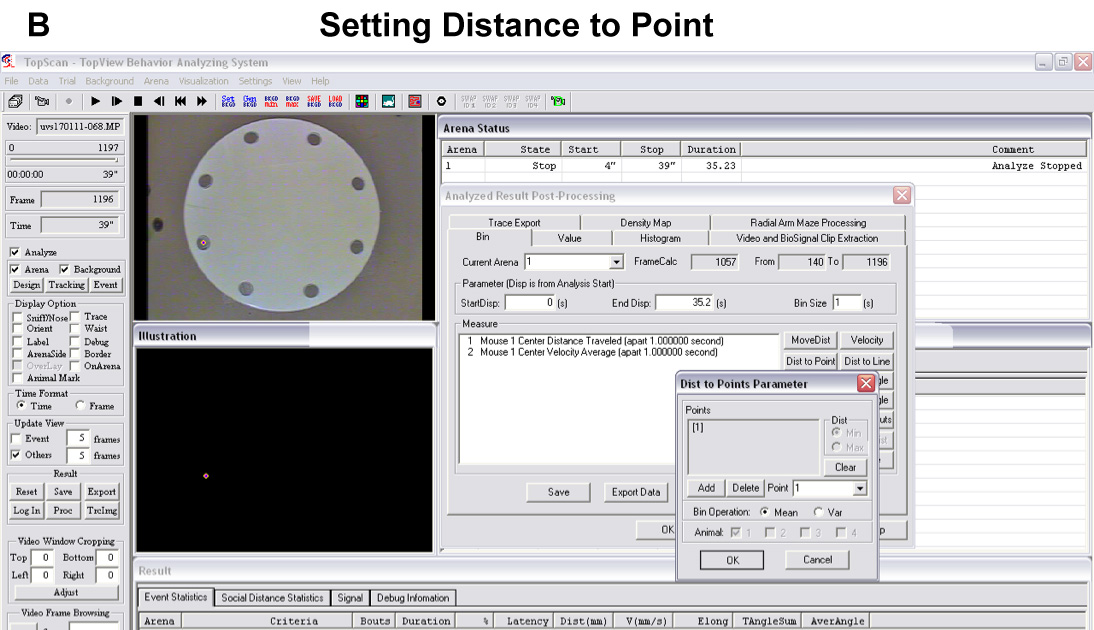


**Figure S2. Data analysis.** A. Screenshot of setting stop rules using the ‘Event’ button. B. Screenshot of setting ‘distance to point’ for data export after video analysis.
